# Supplementary material for: Gain of power of the general regression model compared to Cochran-Armitage Trend tests: simulation study and application to bipolar disorder
Source: Springer Nature journal article supplement (doi:10.1186/s12863-017-0486-6), 2017-03-09

### 1000 Cases – 1000 Controls

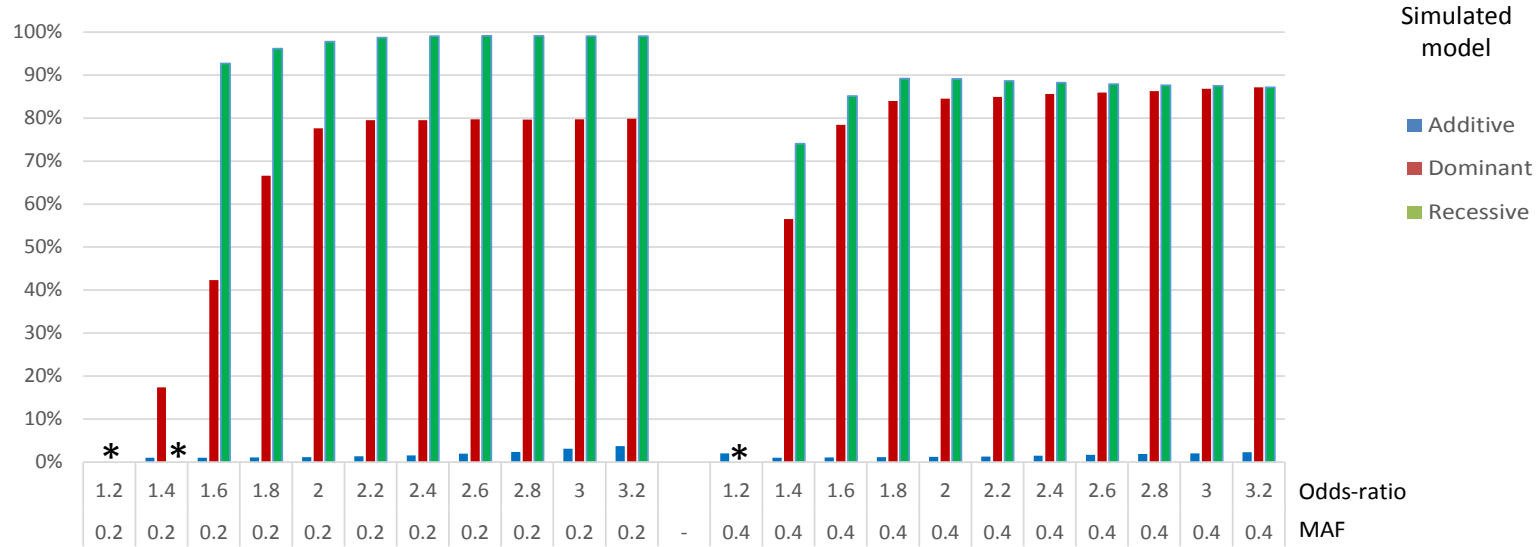

### 2000 Cases – 2000 Controls

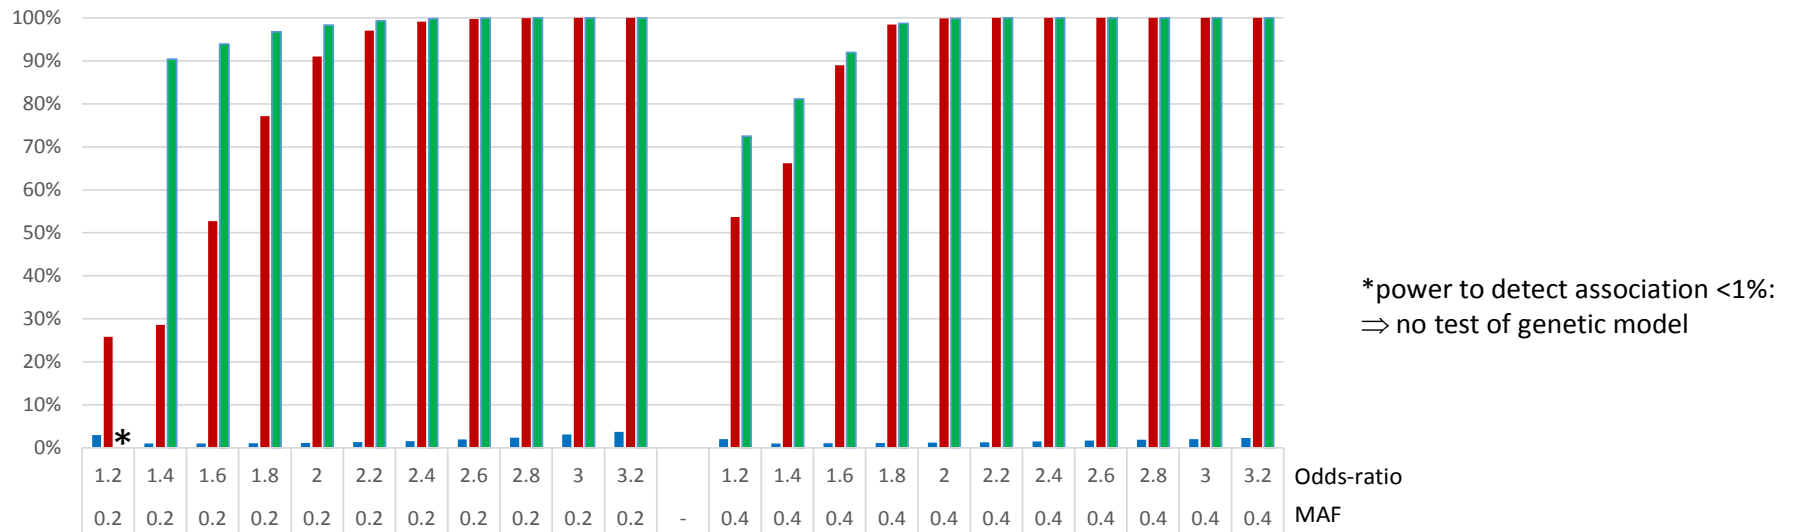

Supplement: MOESM2 [file 12863_2017_486_MOESM2_ESM.pdf]
